# Supplementary material
Source: MDPI journal article supplement (https://www.mdpi.com/1999-4907/8/11/435)
Supplement: s1 [file s1]

Supplementary: De Novo Transcriptome Sequencing in Passiflora *edulis* to Identify Genes and Signaling Pathways Involved in Cold Tolerance

Sian Liu 1,2, Anding Li 3,*, Caihui Chen 1,2, Guojun Cai 3, Limin Zhang 3, Chunyan Guo 4 and Meng Xu 1,2,*

**Table S1** Primer sequences

| Primer_ID | Forward PCR Primer (5′-3′) | Reverse PCR Primer (5′-3′) |
| --- | --- | --- |
| Cluster-5862.11960 | TGGACAGCGGAATCCACACG | GCTTCAACCAGCTCCTGAGACG |
| Cluster-5862.13467 | TCCACTTCGTTGCGCTGTCT | TCTGACCGCACCCAACAACC |
| Cluster-5862.68259 | TCGCTTGGCCATCTCTGCAA | CGTGGCAGGCCATATTTGCG |
| Cluster-5862.13589 | ACAGCCACATGGTGTGCGAT | GGACGACGGAATCAGCGTCAT |
| Cluster-5862.13751 | TCACAGTCACGCCACACAGG | CGGCCAAATCTTGGTCGCATC |
| Cluster-5862.19659 | GCGCCATCCTCAGGCTTCTT | GAGAGACTCGCGCTGTCACC |
| Cluster-5862.20992 | TCAGCTGTGCTTGGGTTGCT | CGCCTCGATCTCCTCCATGC |
| Cluster-5862.23604 | GGAAGTGGTGGCAGCGGTTA | GCTGGTTCGTGCTCGGACAT |
| Cluster-5862.24391 | AAGCACCACAGCGGTAGCAG | TAGAGGGAGGGCGAGGGAGA |
| Cluster-5862.25752 | CTGACGCCACTGAATCCTGCT | ATGCCTGGCAGTAGCGTAGC |
| Cluster-5862.25955 | CGACGACGACGATGATGGCT | TGCCGCCAACAACTGCAAAC |
| ICE1  ICE1-like 1 | GGTCTGCGGGCACTGAACAT  CTGGTATGGTGTGGCGACGA | ATCCCATGCCACCCTTCCCT  AAACGGCGGAAGACGGTGAG |
| ICE1-like 2 | TGCGCTGCCGAGAACTCATC | CGTCGGTGCTGCAACAAGGT |
| CBF1-1 | TGTGTGTGCCTGTCATCGCA | ATCTGCCGCAACAACAGCCT |
| CBF1-2 | GCGATGGCTTCAGCCGAGAA | CCCGTCATCCACCACCGAAG |
| COR | GAGGCCTTTCTCGCCGTCAA | TCGTGGTTGCCGTGAATCCC |
| HIS | AGAGCCATGCAGTGTTGGCA | CTTGGCGTGGATGGCACAGA |


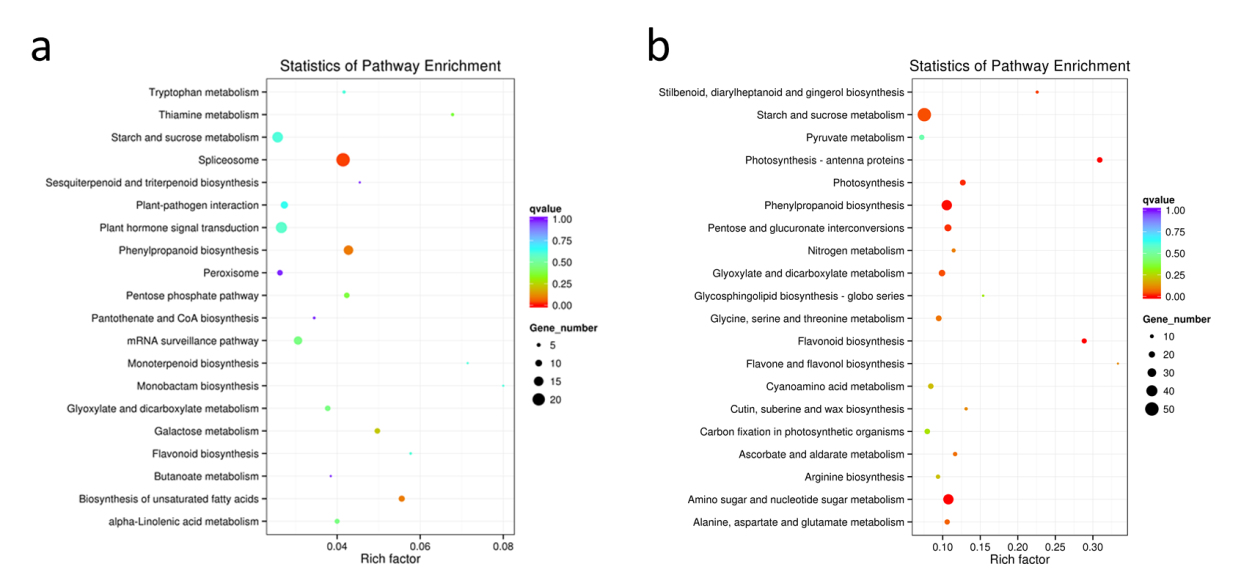


**Figure S1.** KEGG pathway enrichment of up-regulated and down-regulated DEGs. (**a**) Up-regulated DEGs, (**b**) Down-regulated DEGs.


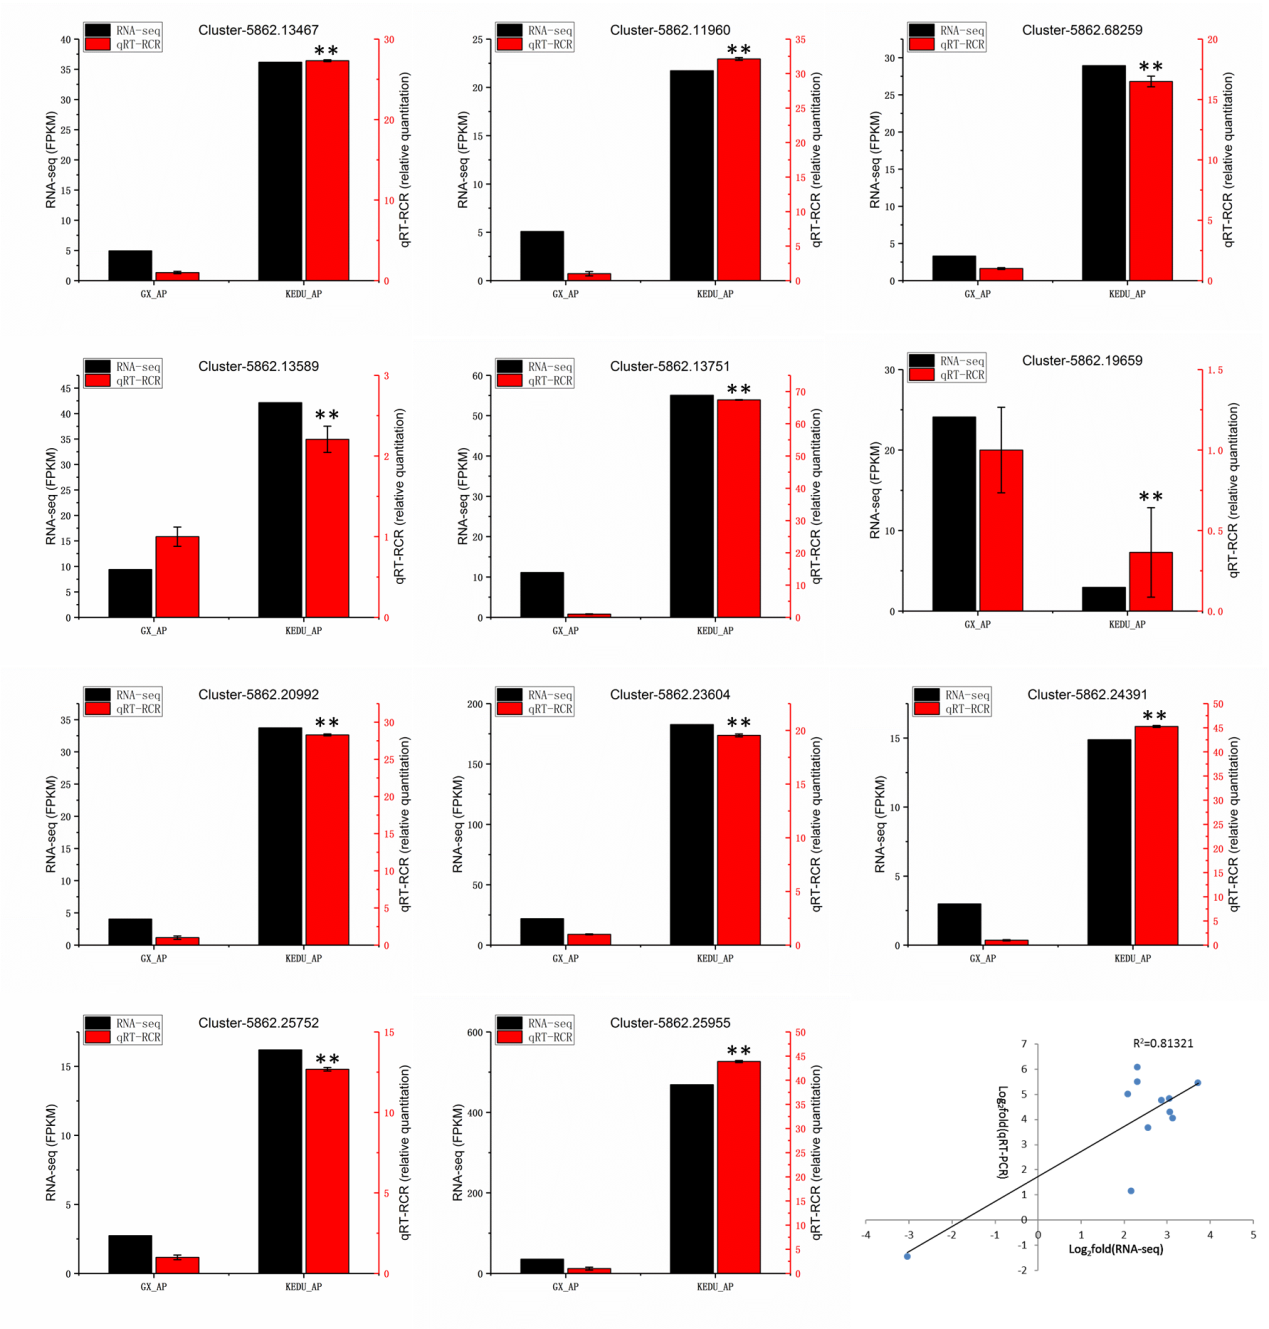


**Figure S2.** Comparison of expression results between RNA sequencing (RNA-seq) and qRT-PCR. Error bars indicate SD. Asterisks indicate a significant difference as determined by Student’s t-test (***P*<0.001).


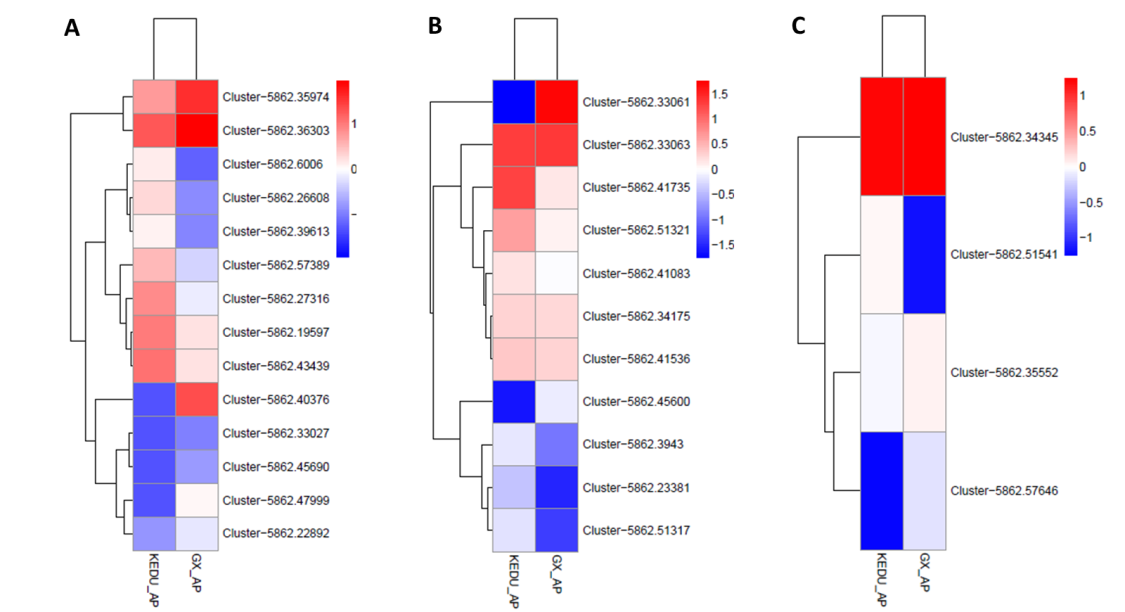


**Figure S3.** Heatmap of important DEGs associated with cold-tolerance. Red indicates high expression genes, while blue indicates low expression genes. Color from red to blue indicate that log10 (FPKM + 1) gradually changes from large to small. (**A**) CaM/CBLs, (**B**) MAPK and (**C**) LEA.


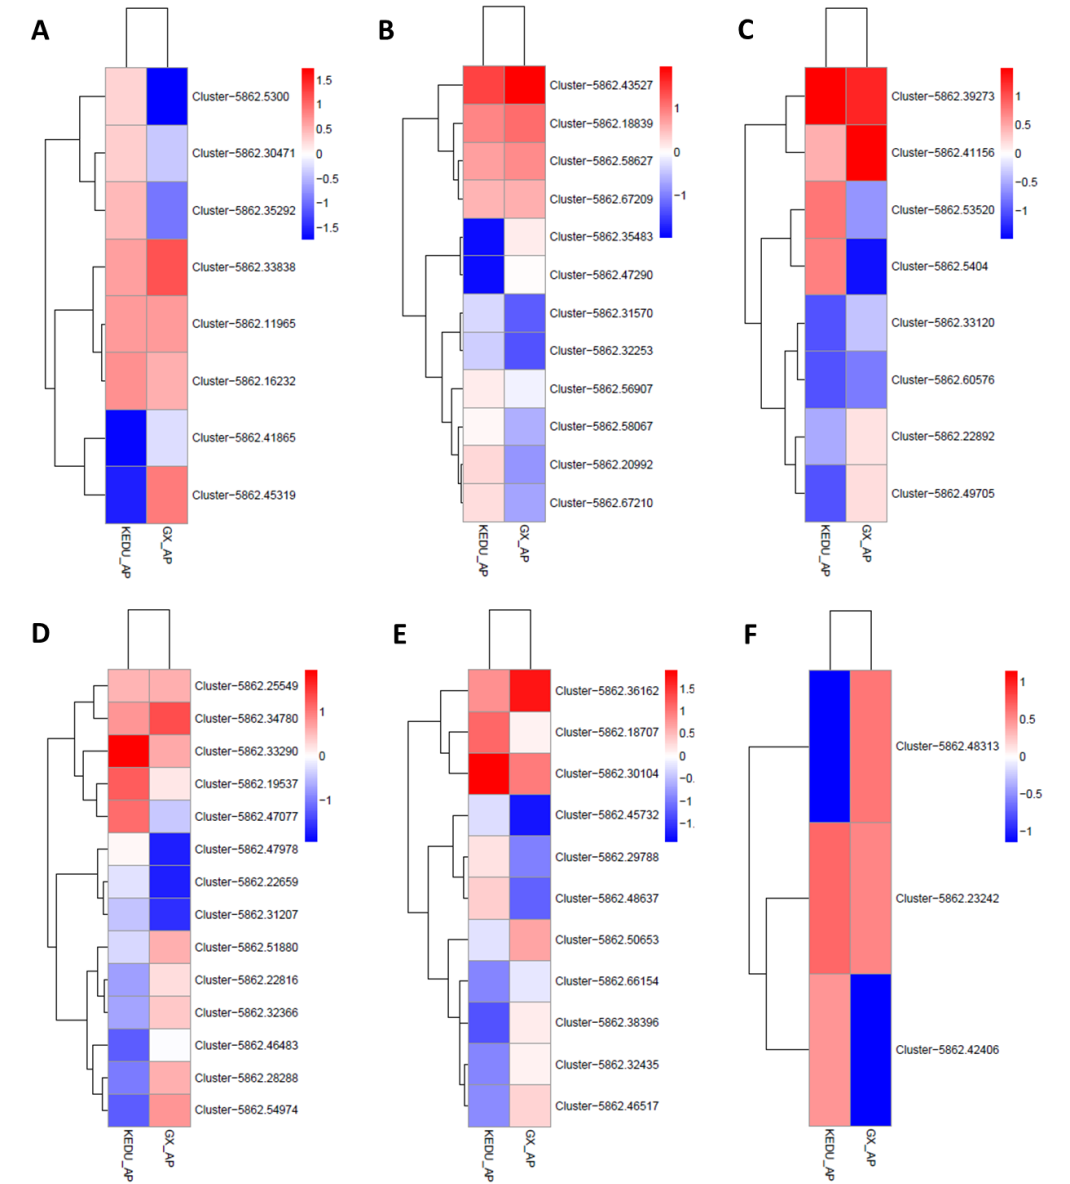


**Figure S4.** Heatmap of differentially expressed transcription factors (TFs) associated with cold-tolerance. Red indicates high expression genes, while blue indicates low expression genes. Color from red to blue indicate that log10 (FPKM + 1) gradually changes from large to small. (**A**) AP2/EREBP, (**B**) WRKY, (**C**) bZIP, (**D**) MYB, (**E**) NAC and (**F**) B-ARR TF families.
